# Supplementary material
Source: Springer Nature journal article supplement (https://www.springermedizin.de/resource/supplementary/12911_2013_750_MOESM2_ESM.pdf/9526602)
Supplement: MOESM2 [file 9526602]

**Table S2. Summary of Patient Decision Aid Studies in Which the Balance of the Aid was Assessed**

| <b>Author, Year, Citation</b>     | <b>Decision context and how balance was considered.</b>                                                                                                                                                | <b>Definition of “balance”.</b>                                                                                                                                                                                                                                     | <b>Whose perspective was assessed?</b>                                                                              | <b>Response categories for assessing balance.</b>                                                                                                                                                                                                                         | <b>Description of side-by-side display format for contrasting options.</b> | <b>Results: How many rate PtDA as “balanced”?</b>                                                         |
|-----------------------------------|--------------------------------------------------------------------------------------------------------------------------------------------------------------------------------------------------------|---------------------------------------------------------------------------------------------------------------------------------------------------------------------------------------------------------------------------------------------------------------------|---------------------------------------------------------------------------------------------------------------------|---------------------------------------------------------------------------------------------------------------------------------------------------------------------------------------------------------------------------------------------------------------------------|----------------------------------------------------------------------------|-----------------------------------------------------------------------------------------------------------|
| Mathieu, Barratt et al., 2010 [1] | Effect of PtDA on knowledge and ability to make informed decision about mammogram screening at age 40.<br><br>“(N)eed for balanced, evidence-based information that enables informed decision making.” | No explicit definition, but explains how to achieve balance.<br><br>Present cumulative risks over an appropriate time frame, use diagrams for probabilities, use large denominators, show event rates as whole numbers, and provide context to consider the effect. | Women aged 38-45 who accessed the website and met eligibility criteria (117 completed the acceptability questions). | 5-point Likert scale: <ul style="list-style-type: none"> <li>• Clearly towards not screening</li> <li>• A little towards not screening</li> <li>• Completely balanced</li> <li>• A little towards having screening</li> <li>• Clearly towards having screening</li> </ul> | No side-by-side display format included.                                   | 49% (57) rated PtDA as completely balanced.<br><br>29% (34) rated PtDA as a little towards not screening. |

|                                           |                                                                                                                                           |                               |                                                                                                             |                                                                                                                                                                                                                                                  |                                                                                                                                                                                      |                                                                                      |
|-------------------------------------------|-------------------------------------------------------------------------------------------------------------------------------------------|-------------------------------|-------------------------------------------------------------------------------------------------------------|--------------------------------------------------------------------------------------------------------------------------------------------------------------------------------------------------------------------------------------------------|--------------------------------------------------------------------------------------------------------------------------------------------------------------------------------------|--------------------------------------------------------------------------------------|
| <p>Smith, Trevena et al, 2010 [2]</p>     | <p>Balanced and fair information on bowel cancer screening.</p>                                                                           | <p>No definition offered.</p> | <p>334 adults aged between 55 and 64 with low education attainment eligible for bowel cancer screening.</p> | <p>Not mentioned.</p>                                                                                                                                                                                                                            | <p>No side-by-side display format; risks on separate pages, with mix of two- and multi-colour risk figures.</p>                                                                      | <p>48% (160) rated PtDA as completely balanced.</p>                                  |
| <p>Griffith, Fichter et al., 2008 [3]</p> | <p>Primary measures: clarity and balance comparing video PtDA versions with and w/o explicit discussion of option to not be screened.</p> | <p>No definition offered.</p> | <p>Single sex volunteer focus groups. 12 groups at 3 sites, total of 106.</p>                               | <p>5-point scale:</p> <ul style="list-style-type: none"> <li>• Strongly in favor of screening</li> <li>• Somewhat in favor</li> <li>• Neither in favour nor against screening</li> <li>• Somewhat against</li> <li>• Strongly against</li> </ul> | <p>No side-by-side display formats were used (according to author).</p> <p>Mentions comparison of the different tests; not clear if the “no screen” option is in the comparison.</p> | <p>16% rated PtDA is neither in favour nor against screening, for both versions.</p> |

|                                          |                                                                                         |                               |                                                  |                                                                                                                                                                                                                                                                       |                                                                                                  |                                                               |
|------------------------------------------|-----------------------------------------------------------------------------------------|-------------------------------|--------------------------------------------------|-----------------------------------------------------------------------------------------------------------------------------------------------------------------------------------------------------------------------------------------------------------------------|--------------------------------------------------------------------------------------------------|---------------------------------------------------------------|
| <p>Spunt, Deyo et al., 1996 [4]</p>      | <p>Balance: completely balanced (if the patients found the program to be balanced).</p> | <p>No definition offered.</p> | <p>239 patients affected with low back pain.</p> | <p>5-point scale:</p> <ul style="list-style-type: none"> <li>• Clearly slanted—surgery</li> <li>• Slightly slanted—surgery</li> <li>• Completely balanced</li> <li>• Slightly slanted--nonsurgical therapy</li> <li>• Clearly slanted--nonsurgical therapy</li> </ul> | <p>Author did not respond to query about use of side-by-side display format.</p>                 | <p>56% (133) rated PtDA “completely balanced.”</p>            |
| <p>Anderson, Carter et al., 2011 [5]</p> | <p>Equally emphasized downsides and benefits.</p>                                       | <p>No definition offered.</p> | <p>22 women with ovarian cancer.</p>             | <p>5-point scale: Decision aid equally emphasized downsides and benefits:</p> <ul style="list-style-type: none"> <li>• Strongly disagree</li> <li>• Disagree</li> <li>• Neutral</li> <li>• Agree</li> <li>• Strongly agree</li> </ul>                                 | <p>Side-by-side display format includes benefits, side effects arguments, with some numbers.</p> | <p>17 of 19 participants (89%) strongly agreed or agreed.</p> |

|                                            |                                                                                                                                                                                                                       |                                                                                |                                                                             |                                                                                                                                                                                                                                                               |                                                                                                                                         |                                                                                                   |
|--------------------------------------------|-----------------------------------------------------------------------------------------------------------------------------------------------------------------------------------------------------------------------|--------------------------------------------------------------------------------|-----------------------------------------------------------------------------|---------------------------------------------------------------------------------------------------------------------------------------------------------------------------------------------------------------------------------------------------------------|-----------------------------------------------------------------------------------------------------------------------------------------|---------------------------------------------------------------------------------------------------|
| <p>Watson, Hewitson et al., 2006 [6]</p>   | <p>RCT of a PtDA about PSA testing. Assessed whether the information in the aid was presented in a “balanced way.”</p> <p>Also used a measure of decisional balance as a measure of attitudes toward PSA testing.</p> | <p>No definition offered.</p>                                                  | <p>Men from 11 GP practices, recruited through computerized registries.</p> | <p>Not fully stated. One option was, information was presented in a “balanced way.”</p>                                                                                                                                                                       | <p>Aid included a summary of the potential benefits and downsides of testing. Information presented as a side-by-side figure/table.</p> | <p>94% of 468 respondents rated the information in the PtDA as presented in a “balanced way.”</p> |
| <p>Drake, Engler-Todd et al., 1999 [7]</p> | <p>Open-ended question concerning fairness and balance during pilot test; in evaluation trial close-ended questions also concerning balance and fairness.</p>                                                         | <p>No definition offered. Implied that balance was equivalent to fairness.</p> | <p>21 women of advanced maternal age and 17 spouses.</p>                    | <p>5-point scale:</p> <ul style="list-style-type: none"> <li>• Clearly slanted to testing</li> <li>• Slightly slanted to testing</li> <li>• Completely balanced</li> <li>• Slightly slanted to no testing</li> <li>• Clearly slanted to no testing</li> </ul> | <p>Worksheet format with risks presented using icon arrays.</p>                                                                         | <p>84% women (n = 21) and 53% men (n = 17)</p> <p>chose “completely balanced.”</p>                |

|                                              |                                                                                   |                                                                                                                 |                                                                                     |                                                                                                                                                                                                                                                        |                                                                                     |                                              |
|----------------------------------------------|-----------------------------------------------------------------------------------|-----------------------------------------------------------------------------------------------------------------|-------------------------------------------------------------------------------------|--------------------------------------------------------------------------------------------------------------------------------------------------------------------------------------------------------------------------------------------------------|-------------------------------------------------------------------------------------|----------------------------------------------|
| Lalonde, O'Connor et al., 2004 [8]           | Development of a PtDA to improve decision quality and adherence to chosen option. | No definition offered. Provided “balanced examples of how others go through the steps” (of making the decision) | 16 patients receiving pharmacologic treatment for hypertension and/or dyslipidemia. | 3-point scale: <ul style="list-style-type: none"> <li>• Slanted towards lifestyle options</li> <li>• Slanted toward taking drugs</li> <li>• Balanced</li> </ul>                                                                                        | Risk of heart disease and stroke presented next to benefits using worksheet format. | 80% rated PtDA as balanced (12 of 16).       |
| van Tol-Geerdink, Stalmeier et al., 2006 [9] | Was the information presented in a structured and balanced way?                   | No definition offered.                                                                                          | 150 prostate cancer patients.                                                       | 5 categories: <ul style="list-style-type: none"> <li>• Clearly in favor of lower dose</li> <li>• Somewhat in favor of lower dose</li> <li>• Balanced</li> <li>• Somewhat in favor of higher dose</li> <li>• Clearly in favor of higher dose</li> </ul> | Probabilities of outcomes presented side-by-side using pie charts.                  | 95% (142) reported “balanced” in PtDA group. |

|                                                     |                                                                        |                               |                                                                                    |                                                                                                                                                                                                                                                 |                                                                                   |                                                       |
|-----------------------------------------------------|------------------------------------------------------------------------|-------------------------------|------------------------------------------------------------------------------------|-------------------------------------------------------------------------------------------------------------------------------------------------------------------------------------------------------------------------------------------------|-----------------------------------------------------------------------------------|-------------------------------------------------------|
| <p>van Tol-Geerdink, Leer et al. submitted [10]</p> | <p>Was the information presented in a structured and balanced way?</p> | <p>No definition offered.</p> | <p>240 patients with prostate cancer choosing between surgery or radiotherapy.</p> | <p>4 categories:</p> <ul style="list-style-type: none"> <li>• Yes, the information was balanced</li> <li>• No, in favour of surgery</li> <li>• No, in favour of brachytherapy</li> <li>• No, in favour of external beam radiotherapy</li> </ul> | <p>Probabilities of outcomes presented in an evidence table using pie charts.</p> | <p>96% (147 of 153) reported “balanced” category.</p> |
|-----------------------------------------------------|------------------------------------------------------------------------|-------------------------------|------------------------------------------------------------------------------------|-------------------------------------------------------------------------------------------------------------------------------------------------------------------------------------------------------------------------------------------------|-----------------------------------------------------------------------------------|-------------------------------------------------------|

## References

- [1] Mathieu E, Barratt AL, McGeechan K, Davey H, Howard K, Houssami N: **Helping women make choices about mammography screening: an online randomized trial of a decision aid for 40-year-old women.** *Patient Educ Couns* 2010; **81**: 63-72.
- [2] Smith S, Trevena L, Simpson J, Barratt A, Nutbeam D, McCaffery K: **A decision aid to support informed choices about bowel cancer screening among adults with low education: randomised controlled trial.** *BMJ* 2010; **341**: c5370
- [3] Griffith J, Fichter M, Fowler F, Lewis C, Pignone M: **Should a colon cancer screening decision aid include the option of no testing? A comparative trial of two decision aids.** *BMC Med Inform Decis Mak* 2008; **8**: 10.
- [4] Spunt B, Deyo RA, Taylor VM, Leek KM, Goldberg H, Mulley A: **An interactive videodisc program for low back pain patients.** *Health Educ Res* 1996; **11**: 535-541.
- [5] Anderson C, Carter J, Nattress K, Beale P, Philp S, Harrison J, Juraskova I: **The booklet helped me not to panic": A pilot of a decision aid for asymptomatic women with ovarian cancer and with rising CA-125 levels.** *Int J Gynecol Cancer* 2011; **21**: 737-743.
- [6] Watson E, Hewitson P, Brett J, Bukach C, Evans R, Edwards A, Elwyn G, Cargill A, Autoske J: **Informed decision making and prostate specific antigen (PSA) testing for prostate cancer: A randomised controlled trial exploring the impact of a brief patient decision aid on men's knowledge, attitudes and intention to be tested.** *Patient Educ Couns* 2006; **63**(SPEC. ISS 3): 367-379.
- [7] Drake E, Engler-Todd L, O'Connor AM, Surh LC, Hunter A: **Development and evaluation of a decision aid about prenatal testing for women of advanced maternal age.** *J Genet Couns* 1999; **8**: 217-233.

- [8] Lalonde L, O'Connor AM, Drake E, Duguay P, Lowensteyn I, Grover SA: **Development and preliminary testing of a patient decision aid to assist pharmaceutical care in the prevention of cardiovascular disease.** *Pharmacotherapy* 2004; **24**: 909-922.
- [9] van Tol-Geerdink JJ, Stalmeier PF, van Lin EN, Schimmel EC, Huizenga H, van Daal WA, Leer JW: **Do prostate cancer patients want to choose their own radiation treatment?** *Int J Radiat Oncol Biol Phys* 2006; **66**: 1105-1111.
- [10] van Tol-Geerdink JJ, Leer JW, Wijburg C, van Oort IM, Vergunst H, van Lin EJNT, Witjes JA, Stalmeier PFM. **Patient participation in the treatment choice does not induce regret: RCT of a decision aid on the treatment choice for prostate cancer.** (submitted).
